# Supplementary material for: Translational Research on Azacitidine Post- Remission Therapy of Acute Myeloid Leukemia in Elderly Patients (QOL-ONE Trans-2)
Source: Preprints.org preprint supplement (doi:10.20944/preprints202409.2257.v1), 2024-09-30
Supplement: Supplementary file 1 [file supplementary]

**APPENDIX A - Home-set of genes for Illumina**

Browser position chr1:1718703-1718942

track name="Covered" description="Agilent SureSelect DNA - myeloid_1905 - Genomic regions overlapped by probes" db=hg19

chr1 MTOR

chr1 CLCN6

chr1 LIN28A

chr1 ARID1A

chr1 MPL

chr1 JAK1

chr1 GFI1

chr1 NRAS

chr1 NOTCH2

chr1 PDE4DIP

chr1 HAX1

chr1 RIT1

chr2 E2F6

chr2 DNMT3A

chr2 ASXL2

chr2 ALK

chr2 FANCL

chr2 SF3B1

chr2 IDH1

chr3 TRNT1

chr3 FANCD2

chr3 VHL

chr3 RAF1

chr3 NBEAL2

chr3 SETD2

chr3 GATA2

chr3 MBD4

chr3 ATR

chr3 GPR171

chr3 MBNL1

chr3 MECOM

chr3 PIK3CA

chr3 RPL35A

chr4 FGFR3

chr4 DHX15

chr4 PDGFRA

chr4 KIT

chr4 KDR

chr4 SRP72

chr4 TET2

chr4 FBXW7

chr4 TLR2

chr4 IRF2

chr5 SDHA

chr5 TERT

chr5 IRX1

chr5 C1QTNF3

chr5 DNAJC21

chr5 NIPBL

chr5 HCN1

chr5 APC

chr5 IRF1

chr5 CDC25C

chr5 HSPA9

chr5 PCDHA1

chr5 CSNK1A1

chr5 CSF1R

chr5 PDGFRB

chr5 NPM1

chr5 FGFR4

chr5 NSD1

chr5 DDX41

chr5 NHP2

chr6 HIST1H3F

chr6 ZNF318

chr6 VEGFA

chr6 PHIP

chr6 ROS

chr6 MYB

chr6 ECT2L

chr6 ARID1B

chr7 TNRC18

chr7 SNX13

chr7 IKZF1

chr7 EGFR

chr7 SBDS

chr7 CDK6

chr7 SAMD9

chr7 SAMD9L

chr7 TAF6

chr7 STAG3

chr7 GNB2

chr7 GIGYF1

chr7 CUX1

chr7 KMT2E

chr7 PIK3CG

chr7 DOCK4

chr7 MET

chr7 SMO

chr7 LUC7L2

chr7 BRAF

chr7 EZH2

chr7 SMARCD3

chr7 KMT2C

chr7 XRCC2

chr8 ARHGEF10

chr8 ESCO2

chr8 FGFR1

chr8 KAT6A

chr8 PXDNL

chr8 TERF1

chr8 RUNX1T1

chr8 BAALC

chr8 RAD21

chr8 MYC

chr9 JAK2

chr9 PTPRD

chr9 CDKN2A

chr9 GNE

chr9 GNAQ

chr9 HNRNPK

chr9 NTRK2

chr9 SYK

chr9 ERCC6L2

chr9 SVEP1

chr9 ABL1

chr9 NUP214

chr9 SETX

chr9 TSC1

chr9 GFI1B

chr9 NOTCH1

chr10 DCLRE1C

chr10 MLLT10

chr10 ANKRD26

chr10 ITGB1

chr10 RET

chr10 PRF1

chr10 CDH23

chr10 WAPAL

chr10 PTEN

chr10 NOLC1

chr10 SMC3

chr10 FGFR2

chr11 HRAS

chr11 NUP98

chr11 TPP1

chr11 SBF2

chr11 RRAS2

chr11 PIK3C2A

chr11 WT1

chr11 SPI1

chr11 NXF1

chr11 SF1

chr11 MAP4K2

chr11 KLC2

chr11 CCND1

chr11 PAK1

chr11 PICALM

chr11 EED

chr11 MRE11A

chr11 DYNC2H1

chr11 ATM

chr11 KMT2A

chr11 CBL

chr11 ETS1

chr12 KDM5A

chr12 CCND2

chr12 NCAPD2

chr12 ETV6

chr12 CDKN1B

chr12 ATF7IP

chr12 ETNK1

chr12 KRAS

chr12 YARS2

chr12 ARID2

chr12 KMT2D

chr12 NFE2

chr12 RPS26

chr12 ERBB3

chr12 CDK4

chr12 MDM2

chr12 SH2B3

chr12 PTPN11

chr12 SETD1B

chr12 NCOR2

chr12 PUS1

chr13 FLT3

chr13 BRCA2

chr13 BRCA2

chr13 PDS5B

chr13 ELF1

chr13 RB1

chr13 DIS3

chr14 ACIN1

chr14 TINF2

chr14 SRP54

chr14 FANCM

chr14 RPS29

chr14 YLPM1

chr14 DICER1

chr14 GLRX5

chr14 ATG2B

chr14 GSKIP

chr14 BCL11B

chr14 AKT1

chr15 NOP10

chr15 RAD51

chr15 MGA

chr15 CDAN1

chr15 C15ORF65

chr15 MAP2K1

chr15 IDH3A

chr15 825EFTUD1

chr15 RPS17

chr15 NTRK3

chr15 FANCI

chr15 IDH2

chr15 BLM

chr15 IGF1R

chr16 TSC2

chr16 CREBBP

chr16 PARN

chr16 MYH11

chr16 RPS15A

chr16 ACSM2A

chr16 PALB2

chr16 RBBP6

chr16 SRCAP

chr16 SETD1A

chr16 CBFB

chr16 NOL3

chr16 CTCF

chr16 CDH1

chr16 TERF2

chr16 RFWD3

chr16 GSE1

chr16 ZFPM1

chr16 PIEZO1

chr16 CBFA2T3

chr16 FANCA

chr17 PRPF8

chr17 TP53

chr17 WRAP53

chr17 CTC1

chr17 RPL26

chr17 NCOR1

chr17 NF1

chr17 SUZ12

chr17 MED1

chr17 ERBB2

chr17 IKZF3

chr17 STAT5B

chr17 STAT3

chr17 RPL27

chr17 BRCA1

chr17 G6PC3

chr17 UBTF

chr17 KANSL1

chr17 RAD51C

chr17 PPM1D

chr17 BRIP1

chr17 DCAF7

chr17 SRSF2

chr18 SETBP1

chr18 DCC

chr18 TCF4

chr18 BCL2

chr19 ELANE

chr19 STK11

chr19 DAZAP1

chr19 DOT1L

chr19 GNA11

chr19 ZBTB7A

chr19 RPS28

chr19 DNM2

chr19 SMARCA4

chr19 EPOR

chr19 KLF1

chr19 CALR

chr19 JAK3

chr19 CEBPA

chr19 AKT2

chr19 RPS19

chr19 ERF

chr19 RRAS

chr19 PRMT1

chr19 U2AF2

chr19 MZF1

chr20 RAD21L1

chr20 IDH3B

chr20 BCL2L1

chr20 ASXL1

chr20 PIGT

chr20 PTPN1

chr20 BCAS1

chr20 AURKA

chr20 GNAS

chr20 RTEL1

chr21 NRIP1

chr21 LTN1

chr21 RUNX1

chr21 ERG

chr21 ETS2

chr21 U2AF1

chr22 CECR1

chr22 MN1

chr22 CHEK2

chr22 NF2

chr22 SF3A1

chr22 CSF2RB

chr22 EP300

chrX CSF2RA

chrX FANCB

chrX ZRSR2

chrX BCOR

chrX USP9X

chrX KDM6A

chrX NDUFB11

chrX GATA1

chrX PIM2

chrX SMC1A

chrX TSR2

chrX ALAS2

chrX AR

chrX MED12

chrX HDAC8

chrX ABCB7

chrX ATRX

chrX UBE2A

chrX STAG2

chrX BCORL1

chrX PHF6

chrX HCFC1

chrX DKC1

chrX BRCC3

chrY CSF2RA
